# Supplementary material for: Natural sequence variants of yeast environmental sensors confer cell-to-cell expression variability
Source: PubMed Central journal article supplement (PMC3817403; doi:10.1038/msb.2013.53), 2013-10-08
Supplement: msb201353-s1.pdf [file msb201353-s1.pdf]

# Supplementary Information

## **Natural sequence variants of yeast environmental sensors confer cell-to-cell expression variability**

Steffen Fehrmann, H el ene Bottin-Duplus, Andri Leonidou, Esther Mollereau, Audrey Bartheleix, Wu Wei, Lars M. Steinmetz and Ga el Yvert.

### TABLE OF CONTENT

|                             |   |
|-----------------------------|---|
| Supplementary Table 1 ..... | 2 |
| Supplementary Table 2 ..... | 3 |
| Supplementary Table 3 ..... | 5 |
| Supplementary Figure 1..... | 7 |
| Supplementary Figure 2..... | 8 |

**Supplementary Table 1. Genotypes of allele-replacement strains for *ERC1***

|                                | <b>SNP</b> | <b>SNP</b> | <b>SNP</b> | <b>SNP</b> | <b>SNP</b> | <b>SNP</b> | <b>INDEL</b> | <b>SNP</b> | <b>SNP</b> |
|--------------------------------|------------|------------|------------|------------|------------|------------|--------------|------------|------------|
| <b>distance from ATG</b>       | 219        | 294        | 580        | 750        | 777        | 822        | 1628         | 1669       | 1798       |
| <b>BYallele</b>                | G          | G          | T          | T          | A          | A          | A            | C          | T          |
| <b>RMallele</b>                | A          | T          | G          | C          | C          | C          | -            | T          | C          |
| <b>GY1019</b> <i>RM-ERC1BY</i> | A          | T          | G          | C          | C          | C          | A            | C          | T          |
| <b>GY1020</b> <i>RM-ERC1BY</i> | G          | G          | T          | T          | A          | A          | A            | C          | T          |
| <b>GY1023</b> <i>BY-ERC1RM</i> | A          | T          | G          | C          | C          | C          | -            | T          | C          |
| <b>GY1024</b> <i>BY-ERC1RM</i> | G          | G          | G          | C          | C          | C          | -            | T          | T          |

Genomic DNA was amplified using primers 1I37 and 1H90 and sequenced. Only polymorphisms present in the targeting construct are represented.

## Supplementary Table 2: Strains used in this study

| Name       | General Background            | Specific Genotypes                                                                                                                                                    | Source                      |
|------------|-------------------------------|-----------------------------------------------------------------------------------------------------------------------------------------------------------------------|-----------------------------|
| BY4712     | S288c                         | <i>MATa leu2Δ0</i>                                                                                                                                                    | (Brachmann et al, 1998)     |
| BY4713     | S288c                         | <i>MATalpha leu2Δ0</i>                                                                                                                                                | (Brachmann et al, 1998)     |
| BY4716     | S288c                         | <i>MATalpha lys2Δ0</i>                                                                                                                                                | (Brachmann et al, 1998)     |
| BY4719     | S288c                         | <i>MATa trp1Δ63 ura3Δ0</i>                                                                                                                                            | (Brachmann et al, 1998)     |
| PHO84L259P | S288c                         | <i>MATalpha leu2Δ0 ura3Δ0 PHO84-L259P</i>                                                                                                                             | (Perlstein et al, 2007)     |
| FYC2-9C    | S288c                         | <i>MATalpha his3Δ200</i>                                                                                                                                              | B. Dujon                    |
| GY51       | S288c                         | <i>MATalpha lys2Δ0 HIS3:(natMX + P<sub>met17</sub>-yEGFP3)</i>                                                                                                        | (Ansel et al, 2008)         |
| GY53       | RM11-1a                       | <i>MATa leu2Δ0 ura3Δ0 amn1Δ::HYG ho::KAN<br/>HIS3:(natMX + P<sub>met17</sub>-yEGFP3):HIS3</i>                                                                         | (Ansel et al, 2008)         |
| GY159      | S288c (94%), RM11-1a (6%)     | <i>MATa leu2Δ0 lys2Δ202 trp1Δ63 ura3Δ0<br/>HIS3:(natMX + P<sub>met17</sub>-yEGFP3):HIS3</i>                                                                           | (Ansel et al, 2008)         |
| GY172      | S288c                         | <i>MATa trp1Δ63 HIS3:(natMX + P<sub>met17</sub>-yEGFP3):HIS3</i>                                                                                                      | (Ansel et al, 2008)         |
| GY174      | S288c (94%), RM11-1a (6%)     | <i>MATa ura3Δ0 HIS3:(natMX + P<sub>met17</sub>-yEGFP3):HIS3</i>                                                                                                       | (Ansel et al, 2008)         |
| GY246      | S288c                         | <i>MATa leu2Δ0 ura3Δ0 HIS3:(natMX + P<sub>met17</sub>-<br/>yEGFP3):HIS3</i>                                                                                           | (Ansel et al, 2008)         |
| GY321      | S288c                         | <i>MATa lys2-128d dst1Δ::hisG HIS3:(natMX + P<sub>met17</sub>-<br/>yEGFP3):HIS3</i>                                                                                   | (Ansel et al, 2008)         |
| GY512      | S288c                         | <i>MATa his3Δ200 lys2-128d dst1Δ::hisG</i>                                                                                                                            | GY321 x FYC2-9C             |
| GY601      | RM11-1a                       | <i>MATa leu2Δ0 URA3 amn1Δ::HYG ho::KAN<br/>HIS3:(natMX + P<sub>met17</sub>-yEGFP3):HIS3</i>                                                                           | (Ansel et al, 2008)         |
| GY768 (X7) | S288c (99%), RM11-1a (1%)     | <i>MATalpha lys2Δ0 HIS3:(natMX + P<sub>met17</sub>-<br/>yEGFP3):HIS3</i>                                                                                              | This study                  |
| GY769 (Z7) | S288c (99%), RM11-1a (1%)     | <i>MATalpha leu2Δ0 HIS3:(natMX + P<sub>met17</sub>-<br/>yEGFP3):HIS3</i>                                                                                              | This study                  |
| GY793 (W7) | S288c (99%), RM11-1a (1%)     | <i>MATalpha lys2Δ0 HIS3:(natMX + P<sub>met17</sub>-<br/>yEGFP3):HIS3</i>                                                                                              | This study                  |
| GY911      | S288c (99.5%), RM11-1a (0.5%) | <i>MATa trp1Δ63 HIS3:(natMX + P<sub>met17</sub>-yEGFP3):HIS3<br/>ePTL1-RM ePTL7-RM</i>                                                                                | GY768 x GY51                |
| GY915      | S288c except one locus        | <i>MATalpha lys2Δ0 trp1Δ63 HIS3:(natMX + P<sub>met17</sub>-<br/>yEGFP3):HIS3 ePTL13-RM</i>                                                                            | GY793 x GY172               |
| GY919      | S288c except one locus        | <i>MATa trp1Δ63 HIS3:(natMX + P<sub>met17</sub>-yEGFP3):HIS3<br/>ePTL8-RM</i>                                                                                         | GY769 x GY172               |
| GY921      | S288c except two loci         | <i>MATa leu2Δ0 HIS3:(natMX + P<sub>met17</sub>-yEGFP3):HIS3<br/>ePTL8-RM chrXV-563573-703057-RM</i>                                                                   | GY769 x GY172               |
| GY926      | S288c except one locus        | <i>MATa lys2Δ0 trp1Δ63 HIS3:(natMX + P<sub>met17</sub>-<br/>yEGFP3):HIS3 ePTL1-RM</i>                                                                                 | GY911 x GY51                |
| GY927      | S288c except one locus        | <i>MATa LYS2. trp1Δ63 HIS3:(natMX + P<sub>met17</sub>-<br/>yEGFP3):HIS3 ePTL7-RM</i>                                                                                  | GY911 x GY51                |
| GY929      | S288c                         | <i>MATalpha leu2Δ0 thr1Δ::kanMX4 HIS3:(natMX +<br/>P<sub>met17</sub>-yEGFP3):HIS3</i>                                                                                 | Euroscarf Y16608 X<br>GY172 |
| GY930      | S288c except one locus        | <i>MATa trp1Δ63 ePTL8-RM</i>                                                                                                                                          | GY919 x BY4716              |
| GY931      | S288c except one locus        | <i>MATa trp1Δ63 cox6Δ::kanMX4 ePTL8-RM</i>                                                                                                                            | This study                  |
| GY935      | S288c except one locus        | <i>MATa lys2Δ0 trp1Δ63 HIS3:(natMX + P<sub>met17</sub>-<br/>yEGFP3):HIS3 ePTL7-RM</i>                                                                                 | GY911 x GY51                |
| GY937      | S288c except three loci       | <i>MATalpha leu2Δ0 trp1Δ63 HIS3:(natMX + P<sub>met17</sub>-<br/>yEGFP3):HIS3 ePTL8-RM ePTL13-RM chrXV-<br/>563573-703057-RM</i>                                       | GY921 x GY915               |
| GY939      | S288c except one locus        | <i>MATa/MATalpha leu2Δ0/LEU2 trp1Δ63/TRP1<br/>THR1/thr1Δ::kanMX4 HIS3/HIS3:(natMX + P<sub>met17</sub>-<br/>yEGFP3):HIS3 cox6Δ::kanMX4/COX6 ePTL8-<br/>RM/ePTL8-BY</i> | GY931 X GY929               |
| GY943      | S288c except four loci        | <i>MATalpha leu2Δ0 trp1Δ63 HIS3:(natMX + P<sub>met17</sub>-<br/>yEGFP3):HIS3 ePTL7-RM ePTL8-RM ePTL13-RM<br/>chrXV-563573-703057-RM</i>                               | GY937 x GY927               |
| GY975      | S288c                         | <i>MATalpha leu2Δ0 hoΔ:: (P<sub>act1</sub>-GFP+KanMX4)</i>                                                                                                            | This study                  |
| GY1002     | S288c                         | <i>MATalpha lys2Δ0 HIS3:(NatMX4 + P<sub>mup1RM</sub>-<br/>yEGFP3):HIS3</i>                                                                                            | This study                  |
| GY1003     | S288c                         | <i>MATalpha lys2Δ0 HIS3:(NatMX4 + P<sub>mup1RM</sub>-<br/>yEGFP3):HIS3</i>                                                                                            | This study                  |
| GY1004     | S288c                         | <i>MATalpha lys2Δ0 HIS3:(NatMX4 + P<sub>mup1RM</sub>-<br/>yEGFP3):HIS3</i>                                                                                            | This study                  |
| GY1005     | S288c                         | <i>MATalpha lys2Δ0 HIS3:(NatMX4 + P<sub>mup1BY</sub>-<br/>yEGFP3):HIS3</i>                                                                                            | This study                  |

|        |                        |                                                                                                                  |                          |
|--------|------------------------|------------------------------------------------------------------------------------------------------------------|--------------------------|
| GY1006 | S288c                  | <i>MATalpha lys2Δ0 HIS3:(NatMX4 +P<sub>mup1BY</sub>-yEGFP3):HIS3</i>                                             | <i>This study</i>        |
| GY1007 | S288c                  | <i>MATalpha lys2Δ0 HIS3:(NatMX4 +P<sub>mup1BY</sub>-yEGFP3):HIS3</i>                                             | <i>This study</i>        |
| GY1019 | RM11-1a                | <i>MATa leu2Δ0 ura3Δ0 amn1::HYG ho::KanMX HIS3:(natMX + P<sub>met17</sub>-yEGFP3):HIS3 ERC1-BY<sup>(i)</sup></i> | <i>This study</i>        |
| GY1020 | RM11-1a                | <i>MATa leu2Δ0 ura3Δ0 amn1::HYG ho::KanMX HIS3:(natMX + P<sub>met17</sub>-yEGFP3):HIS3 ERC1-BY<sup>(i)</sup></i> | <i>This study</i>        |
| GY1023 | S288c                  | <i>MATa leu2Δ0 ura3Δ0 HIS3:(natMX + P<sub>met17</sub>-yEGFP3):HIS3 ERC1-RM<sup>(i)</sup></i>                     | <i>This study</i>        |
| GY1024 | S288c                  | <i>MATa leu2Δ0 ura3Δ0 HIS3:(natMX + P<sub>met17</sub>-yEGFP3):HIS3 ERC1-RM<sup>(i)</sup></i>                     | <i>This study</i>        |
| GY1156 | S288c                  | <i>MATa trp1Δ63 hoΔ:::(P<sub>act1</sub>-GFP+TRP1)</i>                                                            | <i>This study</i>        |
| GY1205 | RM11-1a                | <i>MATa leu2Δ0 ura3Δ0 amn1::HYG ho::KanMX HIS3:(natMX + P<sub>met17</sub>-yEGFP3):HIS3 MUP1-BY</i>               | <i>This study</i>        |
| GY1206 | RM11-1a                | <i>MATa leu2Δ0 ura3Δ0 amn1::HYG ho::KanMX HIS3:(natMX + P<sub>met17</sub>-yEGFP3):HIS3 MUP1-BY</i>               | <i>This study</i>        |
| GY1207 | RM11-1a                | <i>MATa leu2Δ0 ura3Δ0 amn1::HYG ho::KanMX HIS3:(natMX + P<sub>met17</sub>-yEGFP3):HIS3 MUP1-BY</i>               | <i>This study</i>        |
| GY1208 | RM11-1a                | <i>MATa leu2Δ0 ura3Δ0 amn1::HYG ho::KanMX HIS3:(natMX + P<sub>met17</sub>-yEGFP3):HIS3 MUP1-BY</i>               | <i>This study</i>        |
| GY1284 | S288c except one locus | <i>MATalpha lys2Δ0 ePTL13-RM</i>                                                                                 | GY915 x BY4712           |
| GY1296 | S288c                  | <i>MATalpha lys2Δ0 HIS3:(natMX + P<sub>met17</sub>-yEGFP3):HIS3 pho84Δ::KanMX4</i>                               | Euroscarf Y16524 x GY172 |
| GY1302 | S288c except one locus | <i>MATalpha lys2Δ0 ePTL13-RM-atr1Δ::KanMX4</i>                                                                   | <i>This study</i>        |
| GY1303 | S288c except one locus | <i>MATalpha lys2Δ0 ePTL13-RM-pho84Δ::KanMX4</i>                                                                  | <i>This study</i>        |
| GY1306 | S288c                  | <i>MAT? HIS3:(natMX + P<sub>met17</sub>-yEGFP3):HIS3 PHO84-L259P</i>                                             | PHO84L259P x GY172       |
| GY1307 | S288c                  | <i>MAT? HIS3:(natMX + P<sub>met17</sub>-yEGFP3):HIS3 PHO84-L259P</i>                                             | PHO84L259P x GY172       |
| GY1308 | S288c                  | <i>MAT? HIS3:(natMX + P<sub>met17</sub>-yEGFP3):HIS3 PHO84-L259P</i>                                             | PHO84L259P x GY172       |
| GY1309 | S288c except one locus | <i>MATalpha trp1Δ63 HIS3:(natMX + P<sub>met17</sub>-yEGFP3):HIS3 ePTL13-RM-atr1Δ::KanMX4</i>                     | GY1302 x GY172           |
| GY1310 | S288c except one locus | <i>MATalpha lys2Δ0 HIS3:(natMX + P<sub>met17</sub>-yEGFP3):HIS3 ePTL13-RM-pho84Δ::KanMX4</i>                     | GY1303 x GY172           |
| GY1325 | S288c                  | <i>MATalpha lys2Δ0 HIS3:(NatMX4 +P<sub>atr1BY</sub>-yEGFP3):HIS3</i>                                             | <i>This study</i>        |
| GY1326 | S288c                  | <i>MATalpha lys2Δ0 HIS3:(NatMX4 +P<sub>atr1BY</sub>-yEGFP3):HIS3</i>                                             | <i>This study</i>        |
| GY1327 | S288c                  | <i>MATalpha lys2Δ0 HIS3:(NatMX4 +P<sub>atr1RM</sub>-yEGFP3):HIS3</i>                                             | <i>This study</i>        |
| GY1328 | S288c                  | <i>MATalpha lys2Δ0 HIS3:(NatMX4 +P<sub>atr1RM</sub>-yEGFP3):HIS3</i>                                             | <i>This study</i>        |
| GY1330 | S288c                  | <i>MATa leu2Δ0 ura3Δ0 HIS3:(natMX +P<sub>met17</sub>-yEGFP3):HIS3 ATR1-RM</i>                                    | <i>This study</i>        |

(i): See Supplementary Table 1 for the detailed *ERC1* genotype of strains GY1019, GY1020, GY1023 and GY1024.

## REFERENCES:

Ansel J, Bottin H, Rodriguez-Beltran C, Damon C, Nagarajan M, Fehrmann S, Francois J, Yvert G (2008) Cell-to-cell stochastic variation in gene expression is a complex genetic trait. *PLoS Genet* **4**: e1000049

Brachmann CB, Davies A, Cost GJ, Caputo E, Li J, Hieter P, Boeke JD (1998) Designer deletion strains derived from *Saccharomyces cerevisiae* S288C: a useful set of strains and plasmids for PCR-mediated gene disruption and other applications. *Yeast* **14**: 115-132

Perlstein EO, Ruderfer DM, Roberts DC, Schreiber SL, Kruglyak L (2007) Genetic basis of individual differences in the response to small-molecule drugs in yeast. *Nat Genet* **39**: 496-502

**Supplementary Table 3: Primers used in this study.**

| <b>ID</b> | <b>Sequence (5' to 3')</b>                                                            | <b>Comments</b>                                               |
|-----------|---------------------------------------------------------------------------------------|---------------------------------------------------------------|
| 1G84      | GCACGGCGCCAACTGAAAAG                                                                  | RFLP marker of PTL chrVII position 599377 (SfcI)              |
| 1G85      | GGCCTGCCTCAAAATCGGAG                                                                  | RFLP marker of PTL chrVII position 599377 (SfcI)              |
| 1G88      | ATGGCATCGTCTAGTGATTA                                                                  | RFLP marker of PTL chrI position 47045 (TfiI)                 |
| 1G89      | CTGAGAGACTCTCTCCCTT                                                                   | RFLP marker of PTL chrI position 47045 (TfiI)                 |
| 1G90      | AAAGACATCCGGATAGCAAA                                                                  | RFLP marker of candidate locus chrV position 203237 (HphI)    |
| 1G91      | TTTGCATCTGCAGTGACAAC                                                                  | RFLP marker of candidate locus chrV position 203237 (HphI)    |
| 1G92      | TTACTCCAAAAGGCTCCTGA                                                                  | RFLP marker of candidate locus chrVI position 263987 (MfeI)   |
| 1G93      | CGATAACTCGGTACGATCAA                                                                  | RFLP marker of candidate locus chrVI position 263987 (MfeI)   |
| 1G96      | CACCACCAAACAGTCCTGGA                                                                  | RFLP marker of candidate locus chrIX position 199365 (TfiI)   |
| 1G97      | CCGGATTCCAGTGATGCTTA                                                                  | RFLP marker of candidate locus chrIX position 199365 (TfiI)   |
| 1H01      | CTATAGTTCATATACCATAGGC                                                                | RFLP marker of candidate locus chrXIII position 807167 (BbsI) |
| 1H02      | GTATGCAACTGCTATCATTC                                                                  | RFLP marker of candidate locus chrXIII position 807167 (BbsI) |
| 1H03      | TACCGATGGTTAAAAATGA                                                                   | Marker of PTL chrXV position 625582 (HRM)                     |
| 1H04      | GGGGATTATGTATTGAAAC                                                                   | Marker of PTL chrXV position 625582 (HRM)                     |
| 1H23      | CATAGCCAAGGCCAGTTGATTGA                                                               | RFLP marker of PTL chrVIII position 160869 (BsaJI)            |
| 1H24      | ACCGGCACCAATCATGGATGA                                                                 | RFLP marker of PTL chrVIII position 160869 (BsaJI)            |
| 1H27      | TGCACTGTGGCTTAGCGGAAA                                                                 | RFLP marker of PTL chrXIII position 40087 (MseI)              |
| 1H28      | GAACCGAGCGATGACGATTTGA                                                                | RFLP marker of PTL chrXIII position 40087 (MseI)              |
| 1H89      | TCGCTATACGACAGCTGCATGA                                                                |                                                               |
| 1H90      | ATGCCACATGGCGAAACCCTTA                                                                |                                                               |
| 1112      | tctttcattatgtgagagttaaaaaaccagaaactacatcatcgaaaaag-<br>GCTTTTCACGCCTGCAGACTACAT       |                                                               |
| 1113      | cgcccaatacgcgaaaccgcctctccccgcgcttgccgattcattaat<br>g-TACGTCATTCGACCCTGAAGGAGT        |                                                               |
| 1129      | cgcccaatacgcgaaaccgcctctccccgcgcttgccgattcattaat<br>g-tctaga-AGGGCAACCCAACCGGTAATAGAA |                                                               |
| 1132      | tctttcattatgtgagagttaaaaaaccagaaactacatcatcgaaaaag-<br>TCACTTGGTCGCCAACTTCAAGG        |                                                               |
| 1135      | taattcaacaaaattgggacaacaccagtgaataattcttcaccttta-<br>GACAT-TGCTCCGCCTTTGTTTTTC        |                                                               |
| 1136      | ccgctgtctaacgacaatatgtccatattggtgactctcagtacaatctgc<br>-CTCCACAAATGCCCCACAAAC         |                                                               |
| 1137      | CCTTCCTATACCGGCAATGACGAT                                                              |                                                               |
| 1180      | GGAAAAGTTGGGTTGGAAGGATGA                                                              |                                                               |
| 1181      | GGTTGGCGTAATTCTCCTGGGAAA                                                              |                                                               |
| 1198      | tcaacaaaattgggacaacaccagtgaataattcttcacctttaGAC<br>AT-TATTATTACCTGTTTGAGATTCTC        |                                                               |

|      |                                                                                |                                      |
|------|--------------------------------------------------------------------------------|--------------------------------------|
| 1I99 | ccgcttctaacgacaatatgtccatatgggtgcactctcagtacaatctgc<br>-CGTCATTAAGACAAGCTCC    |                                      |
| 1J06 | CCGAGCGATCCTGAATACGCTTTA                                                       |                                      |
| 1J07 | TGGGGAGGGCAAGAAATTGGTT                                                         |                                      |
| 1J08 | ACTACCCGGAGATGACTTCAAACG                                                       |                                      |
| 1J09 | GACAATTGAGGCGCAGGATAAACG                                                       |                                      |
| 1J10 | tctttcattatgtgagagttaaaaaccagaaactacatcatcgaaaaag-<br>AGCTCCATCCGCTGTACAGTTCTA |                                      |
| 1J11 | cgccaatacgcgcaaccgcctctccccgcgcttgccgattcattaat<br>g-GGAAAAGATGCCATCAGCCATGAC  |                                      |
| 1J12 | TCATGGCCAATACCTTGACA                                                           | RFLP marker of ATR1 (ApoI)           |
| 1J13 | CCTATCACGCCAAAACAGAACCA                                                        | RFLP marker of ATR1 (ApoI)           |
| 1J15 | TCTTATCTTGGTTGCTGCTT                                                           | To genotype PHO84-L259P polymorphism |
| 1J16 | CTTTTCGCCATCTTGTTCTTG                                                          | To genotype PHO84-L259P polymorphism |

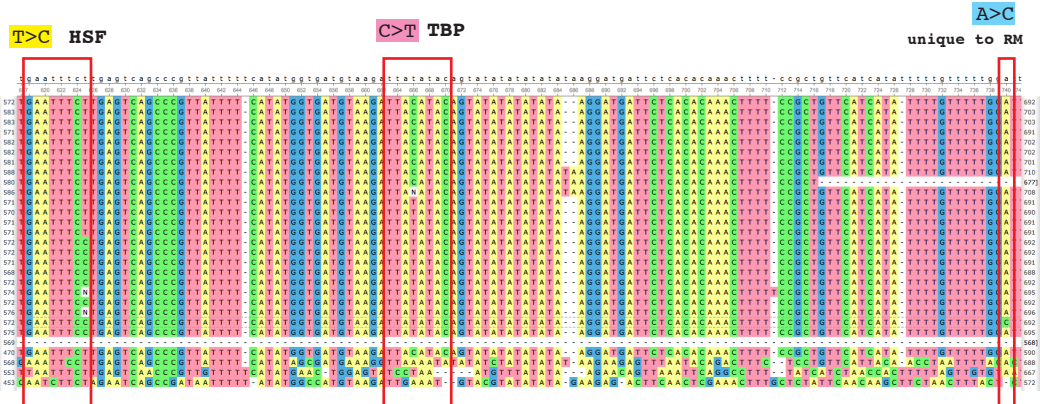

**T>G ADR1**

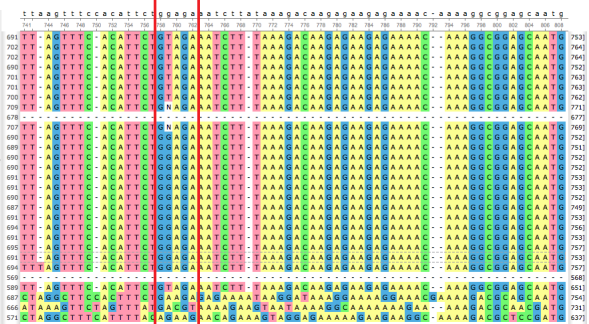

**Supplementary Figure 1. Sequence alignment of the promoter region of MUP1.**

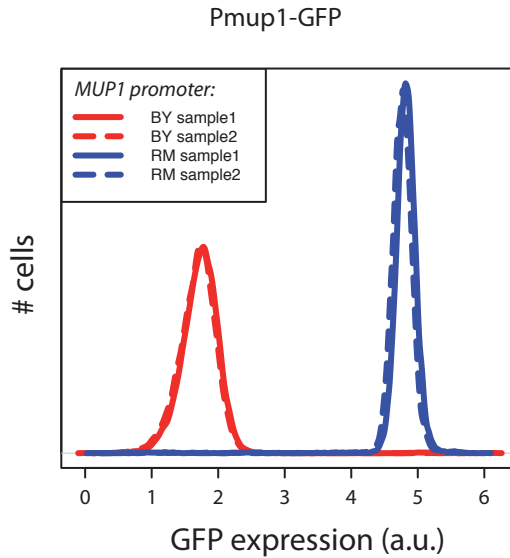

### Supplementary Figure 2.

Representative distributions of GFP expression levels obtained by flow cytometry on populations of cells harboring a Pmup1-GFP integrated reporter. Two strains are shown, one carrying the BY variant of the MUP1 promoter (GY1006, red) and one carrying the RM variant (GY1002, blue). Each strain was cultured in duplicates (plain and dashed line).
